# Supplementary material for: Diagnostic Accuracy of the Truenat MTB Plus Assay and Comparison with the Xpert MTB/RIF Assay to Detect Tuberculosis among Hospital Outpatients in Cameroon
Source: PubMed Central journal article supplement (PMC9383115; doi:10.1128/jcm.00155-22), 2022-07-21
Supplement: jcm.00155-22-s0001.pdf [file jcm.00155-22-s0001.pdf]

## Supplemental material

**Table S1.** Sensitivity and specificity of the two Truenat MTB Plus tests on two sputum specimens collected on two days, as compared to the reference standard of TB culture. Results for all participants, and by HIV-status, smear status, and history of TB; for a total of 939 participants included in the analysis (248 culture-positive and 691 culture-negative)

| Two Truenat MTB Plus tests on two specimens |     |     |    |    |     | Sensitivity    | Specificity  |
|---------------------------------------------|-----|-----|----|----|-----|----------------|--------------|
|                                             | N   | TP  | FP | FN | TN  | % (95% CI)     | % (95% CI)   |
| All participants                            | 939 | 228 | 45 | 20 | 646 | 92% (88-95%)   | 93% (91-95%) |
| HIV status                                  |     |     |    |    |     |                |              |
| HIV+                                        | 350 | 64  | 16 | 9  | 261 | 88% (77-94%)   | 94% (91-97%) |
| HIV-                                        | 587 | 163 | 29 | 11 | 384 | 94% (89-97%)   | 93% (90-95%) |
| Smear status*                               |     |     |    |    |     |                |              |
| Smear-negative                              | 47  | 28  |    | 19 |     | 60% (44-73%)   |              |
| Smear-positive                              | 201 | 200 |    | 1  |     | 100% (97-100%) |              |
| History of TB                               |     |     |    |    |     |                |              |
| History of TB                               | 134 | 22  | 10 | 2  | 100 | 92% (72-99%)   | 91% (84-95%) |
| No history of TB                            | 805 | 206 | 35 | 18 | 546 | 92% (87-95%)   | 94% (92-96%) |

&There were 6 participants of the total 945 who did not have a 2<sup>nd</sup> Truenat result recorded, so only 939 participants were included in this analysis; ¶2 participants did not have HIV status recorded; \*Among participants with culture-positive TB

**Table S2.** Number of participants with one or more culture positive for nontuberculous mycobacteria, by mycobacterial species identified; detailed results by participant are shown in Table S5.

| <b>Species</b>           | <b>N</b>  |
|--------------------------|-----------|
| <i>M. abscessus</i>      | 6         |
| <i>M. avium</i>          | 5         |
| <i>M. chelonae</i>       | 1         |
| <i>M. fortuitum</i>      | 14        |
| <i>M. goodii</i>         | 2         |
| <i>M. interjectum</i>    | 1         |
| <i>M. intracellulare</i> | 12        |
| <i>M. kansasii</i>       | 1         |
| <i>M. scrofulaceum</i>   | 4         |
| <i>M. simiae</i>         | 1         |
| Other mycobacteria       | 12        |
| <b>Total</b>             | <b>59</b> |

**Table S3.** Result distribution by type of result (valid, invalid or error) obtained for the Truenat MTB Plus assays on the first amplification attempt for each specimen after extraction and the second amplification attempt for those with invalid or error first result; results shown only for Lot B, the second lot received that was used for most of the testing

| <b>Result type</b> | <b>First attempt<br/>N, %</b> |       | <b>Second attempt<br/>n, %</b> |       |
|--------------------|-------------------------------|-------|--------------------------------|-------|
| <i>Error*</i>      | 55                            | 4.1%  | 13                             | 9.3%  |
| <i>Invalid</i>     | 81                            | 6.0%  | 17                             | 12.1% |
| <i>Valid</i>       | 1,217                         | 89.9% | 110                            | 78.6% |
| <i>Total tests</i> | 1,353                         |       | 140                            |       |

*\*Of the 55 results that were reported as errors, the distribution by type of error as reported by the instrument was: 2 Error-1, 3 Error-1A, 4 Error-2, 45 Error-3, 1 Error-4*

**Table S4.** Characteristics, laboratory results and clinical outcome for 31 participants with 1<sup>st</sup> Truenat MTB Plus result positive and TB culture negative results

| Participant characteristics |                   |        |               |                          |            | Results- sputum specimen #1 |                      |                      | Result- sputum specimen #2 | Outcome                               |                                          |
|-----------------------------|-------------------|--------|---------------|--------------------------|------------|-----------------------------|----------------------|----------------------|----------------------------|---------------------------------------|------------------------------------------|
| SN                          | Age group (years) | Sex    | History of TB | Years since TB treatment | HIV result | Truenat MTB Plus result     | Xpert MTB/RIF result | Xpert MTB/RIF Ultra* | Truenat MTB Plus result,   | Started TB treatment <sup>&amp;</sup> | Vital status at 2 months post enrollment |
| 1                           | 35-44             | Male   | No            | N/A                      | Positive   | MTB v. low                  | NOT                  | Trace                | NOT                        | No                                    | Alive                                    |
| 2                           | 55-64             | Female | No            | N/A                      | Negative   | MTB v. low                  | MTB v. low           | --                   | MTB v. low                 | Yes                                   | Alive                                    |
| 3                           | 55-64             | Female | No            | N/A                      | Positive   | MTB v. low                  | MTB v. low           | --                   | MTB v. low                 | Yes                                   | Alive                                    |
| 4                           | 45-54             | Female | No            | N/A                      | Negative   | MTB v. low                  | NOT                  | Trace                | MTB v. low                 | No                                    | Alive                                    |
| 5                           | 25-34             | Male   | Yes           | >5 yrs                   | Positive   | MTB v. low                  | NOT                  | Trace                | --                         | Yes                                   | Alive                                    |
| 6                           | 55-64             | Male   | Yes           | >2 to <=5 yrs            | Negative   | MTB low                     | MTB low              | --                   | NOT                        | Yes                                   | Alive                                    |
| 7                           | 35-44             | Male   | Yes           | >2 to <=5 yrs            | Positive   | MTB low                     | NOT                  | NOT                  | NOT                        | No                                    | Lost to follow-up                        |
| 8                           | 55-64             | Male   | Yes           | >2 to <=5 yrs            | Negative   | MTB v. low                  | NOT                  | NOT                  | NOT                        | Yes                                   | Alive                                    |
| 9                           | 65-74             | Female | No            | N/A                      | Negative   | MTB low                     | NOT                  | NOT                  | NOT                        | Yes                                   | Lost to follow-up                        |
| 10                          | 65-74             | Male   | No            | N/A                      | Negative   | MTB v. low                  | NOT                  | NOT                  | MTB low                    | No                                    | Dead                                     |
| 11                          | 15-24             | Male   | Yes           | >1 to <=2 yrs            | Negative   | MTB v. low                  | NOT                  | Trace                | NOT                        | No                                    | Lost to follow-up                        |
| 12                          | 35-44             | Female | No            | N/A                      | Negative   | MTB v. low                  | NOT                  | Trace                | NOT                        | Yes                                   | Alive                                    |
| 13                          | 45-54             | Male   | No            | N/A                      | Negative   | MTB v. low                  | NOT                  | Trace                | NOT                        | Yes                                   | Alive                                    |
| 14                          | 25-34             | Male   | No            | N/A                      | Negative   | MTB v. low                  | NOT                  | NOT                  | --                         | No                                    | Lost to follow-up                        |
| 15                          | 15-24             | Female | No            | N/A                      | Negative   | MTB low                     | NOT                  | Trace                | MTB v. low                 | Yes                                   | Lost to follow-up                        |
| 16                          | 75-84             | Female | No            | N/A                      | Negative   | MTB v. low                  | NOT                  | Trace                | NOT                        | No                                    | Alive                                    |
| 17                          | 45-54             | Female | No            | N/A                      | Positive   | MTB v. low                  | MTB v. low           | --                   | NOT                        | Yes                                   | Other                                    |
| 18                          | 55-64             | Female | No            | N/A                      | Positive   | MTB v. low                  | NOT                  | Trace                | NOT                        | Yes                                   | Alive                                    |
| 19                          | 65-74             | Male   | No            | N/A                      | Negative   | MTB v. low                  | NOT                  | Trace                | NOT                        | Yes                                   | Dead                                     |
| 20                          | 15-24             | Female | No            | N/A                      | Negative   | MTB v. low                  | NOT                  | NOT                  | NOT                        | Yes                                   | Alive                                    |
| 21                          | 55-64             | Female | Yes           | >1 to <=2 yrs            | Positive   | MTB v. low                  | MTB v. low           |                      | NOT                        | Yes                                   | Alive                                    |

|    |       |        |     |        |          |            |            |       |            |     |                   |
|----|-------|--------|-----|--------|----------|------------|------------|-------|------------|-----|-------------------|
| 22 | 55-64 | Female | No  | N/A    | Negative | MTB low    | NOT        | NOT   | NOT        | Yes | Alive             |
| 23 | 35-44 | Female | No  | N/A    | Negative | MTB v. low | NOT        | NOT   | NOT        | No  | Alive             |
| 24 | 25-34 | Male   | No  | N/A    | Positive | MTB low    | NOT        | Trace | MTB v. low | No  | Lost to follow-up |
| 25 | 55-64 | Female | No  | N/A    | Positive | MTB v. low | NOT        | Trace | MTB v. low | Yes | Alive             |
| 26 | 35-44 | Female | No  | N/A    | Negative | MTB v. low | MTB v. low | --    | NOT        | Yes | Alive             |
| 27 | 55-64 | Female | No  | N/A    | Negative | MTB v. low | NOT        | NOT   | MTB v. low | No  | Dead              |
| 28 | 35-44 | Male   | Yes | >5 yrs | Positive | MTB v. low | NOT        | Trace | NOT        | Yes | Alive             |
| 29 | 45-54 | Male   | No  | N/A    | Positive | MTB v. low | NOT        | NOT   | NOT        | Yes | Alive             |
| 30 | 65-74 | Male   | No  | N/A    | Negative | MTB v. low | MTB v. low | --    | NOT        | Yes | Alive             |
| 31 | 45-54 | Male   | Yes | <=1 yr | Negative | MTB v. low | MTB v. low | --    | MTB v. low | Yes | Alive             |

*All participants provided two sputum specimens that were smear-negative and culture-negative for TB.*

*MTB- Mycobacterium tuberculosis complex; NOT- MTB not detected*

\*The Xpert MTB/RIF Ultra assay produces one of 5 results when MTB is detected; these are high, medium, low, very low or trace. The trace result indicates that *rpoB* gene amplification was not detected and only the multi-copy insertion elements were detected on amplification.

-- No testing done. Ultra testing was only performed for specimens with Xpert MTB/RIF results that were negative.; 2 people did not have a second Truenat test result recorded.

&Reasons for not starting TB treatment varied by participant; in some cases, the clinician recommended not starting or not continuing TB treatment and in other cases the participant declined TB treatment or was lost to follow-up before being offered treatment.
